# Supplementary material
Source: publisher figshare collection journal article supplement (https://rs.figshare.com/ndownloader/files/17922707)
Supplement: Supplementary file 1 [file 17922707]

## Sheet: Table S1. Localities
Table S1. Collection data for vent/seep pectinodontids used in the present study. Sources of limpets used for substrate translocation highlighted in grey.
Genus	Locality	Area	Type	Lat.	Long.	Depth	N
Bathyacmaea	Off Hatsushima	Sagami Bay	Seep	35°00'N	139°14'E	1172 m	23
	Iheya North Knoll	Okinawa Trough	Vent	27°48'N	126°54'E	982 m	18
	Izena Knoll	Okinawa Trough	Vent	27°16'N	127°04'E	1309 m	15
	Hatoma Knoll	Okinawa Trough	Vent	24°52'N	123°51'E	1473 m	10
	Dai-Yon Yonaguni Knoll	Okinawa Trough	Vent	24°51'N	122°42'E	1387 m	11
	Jiaolong Ridge	South China Sea	Seep	22°07'N	119°17'E	1138 m	7
Serradonta	Off Hatsushima	Sagami Bay	Seep	35°00'N	139°14'E	1172 m	10
	Iheya North Knoll	Okinawa Trough	Vent	27°48'N	126°54'E	982 m	2
* Supplementary material for: Chen C, Watanabe HK, Nagai Y, Toyofuku T, Xu T, Sun J, Qiu J-W & Sasaki T. Complex factors shape phenotypic variation in deep-sea limpets. Biology Letters.

## Sheet: Table S2. COI_Haplotypes
Table S2. COI haplotypes from each locality and their corresponding DDBJ/ENA/GenBank Accession No.
Genus	Locality	Accession No.																															Total
		LC456808	LC456809	LC456810	LC456811	LC456812	LC456813	LC456814	LC456815	LC456816	LC456817	LC456818	LC456819	LC456820	LC456821	LC456822	LC456823	LC456824	LC456825	LC456826	LC456827	LC456828	LC456829	LC456830	LC456831	LC456832	LC456833	LC456834	LC456835	LC456836	LC456837	LC456838
Bathyacmaea	Off Hatsushima	7	3	2						1	2	1	1		1			1		2		1	1										23
	Iheya North Knoll	8		2	2	1		1																1		1				1		1	18
	Izena Hole	6		2	4		1												1		1												15
	Hatoma Knoll	3	1		1											1			1						1		1		1				10
	Dai-Yon Yonaguni Knoll	6	1	2	1																							1					11
	Jiaolong Ridge			2	1				1																								4
Serradonta	Off Hatsushima	2	1	2	1									1			2														1		10
	Iheya North Knoll	2																															2
Total		34	6	12	10	1	1	1	1	1	2	1	1	1	1	1	2	1	2	2	1	1	1	1	1	1	1	1	1	1	1	1	93
* Supplementary material for: Chen C, Watanabe HK, Nagai Y, Toyofuku T, Xu T, Sun J, Qiu J-W & Sasaki T. Complex factors shape phenotypic variation in deep-sea limpets. Biology Letters.

## Sheet: Table S3. H3_Haplotypes
Table S3. H3 haplotypes from each locality and their corresponding DDBJ/ENA/GenBank Accession No.
Genus	Locality	Accession No.				Total
		LC456839	LC456840	LC456841	LC456842
Bathyacmaea	Off Hatsushima	3	1	3		7
	Izena Hole	1	7		1	9
	Jiaolong Ridge	1	5	1		7
Serradonta	Off Hatsushima	3	1	6		10
Total		8	14	10	1	33
* Supplementary material for: Chen C, Watanabe HK, Nagai Y, Toyofuku T, Xu T, Sun J, Qiu J-W & Sasaki T. Complex factors shape phenotypic variation in deep-sea limpets. Biology Letters.

## Sheet: Table S4. 18S Haplotypes
Table S4. 18S haplotypes from each locality and their corresponding DDBJ/ENA/GenBank Accession No.
Genus	Locality	Accession No.		Total
		MN130949	MN130950
Bathyacmaea	Off Hatsushima	4		4
	Izena Hole	4		4
	Jiaolong Ridge	1		1
Serradonta	Off Hatsushima	5	1	6
Total		14	1	15
* Supplementary material for: Chen C, Watanabe HK, Nagai Y, Toyofuku T, Xu T, Sun J, Qiu J-W & Sasaki T. Complex factors shape phenotypic variation in deep-sea limpets. Biology Letters.
